# Supplementary material
Source: PubMed Central journal article supplement (PMC1544162)
Supplement: pnas_0603678103_2.pdf [file pnas_0603678103_2.pdf]

SUPPLEMENTAL TABLE. Functional categorization of 88 genes in Gleason classifier

| HUGO                                               | NAME                                                                      | GENBANK   | ENTREZ GENE            | AVE FOLD Δ<br>GL4+5 / GL3 |
|----------------------------------------------------|---------------------------------------------------------------------------|-----------|------------------------|---------------------------|
| <b>METABOLISM - CARBOHYDRATE</b>                   |                                                                           |           |                        |                           |
| GLO1                                               | Glyoxalase I                                                              | BX462360  | <a href="#">2739</a>   | 1.9                       |
| HIG1                                               | Likely ortholog of mouse hypoxia induced gene 1                           | AL533096  | <a href="#">25994</a>  | 1.8                       |
| PGK1                                               | Phosphoglycerate kinase 1                                                 | CR613425  | <a href="#">5230</a>   | 1.8                       |
| PRPS1                                              | Phosphoribosyl pyrophosphate synthetase 1                                 | BM685070  | <a href="#">5631</a>   | 1.6                       |
| DPM1                                               | Dolichyl-phosphate mannosyltransferase polypeptide 1 catalytic subunit    | BM457694  | <a href="#">8813</a>   | 1.5                       |
| PPP1CA                                             | Protein phosphatase 1 catalytic subunit alpha isoform                     | BU147403  | <a href="#">5499</a>   | -1.2                      |
| <b>METABOLISM - ENERGY</b>                         |                                                                           |           |                        |                           |
| COX7A2L                                            | Cytochrome c oxidase subunit VIIa polypeptide 2 like                      | BG031820  | <a href="#">9167</a>   | 1.8                       |
| ATP5B                                              | ATP synthase H+ transporting mitochondrial F1 complex beta polypeptide    | CR591449  | <a href="#">506</a>    | 1.7                       |
| ATP5G3                                             | ATP synthase H+ transporting mitochondrial F0 complex subunit c isoform 3 | CK126069  | <a href="#">518</a>    | 1.7                       |
| NDUFB3                                             | NADH dehydrogenase 1 beta subcomplex 3 12kDa                              | AW008598  | <a href="#">4709</a>   | 1.7                       |
| COX6C                                              | Cytochrome c oxidase subunit VIc                                          | AI217634  | <a href="#">1345</a>   | 1.6                       |
| ATP6V1F                                            | ATPase H+ transporting lysosomal 14kDa V1 subunit F                       | NM_004231 | <a href="#">9296</a>   | 1.5                       |
| PRDX5                                              | Peroxisredoxin 5                                                          | AF110731  | <a href="#">25824</a>  | 1.5                       |
| TXNDC                                              | Thioredoxin domain containing                                             | BQ926682  | <a href="#">81542</a>  | 1.5                       |
| LOC152485                                          | Hypothetical protein LOC152485                                            | BC033655  | <a href="#">152485</a> | -2.8                      |
| <b>METABOLISM - LIPID/STEROL</b>                   |                                                                           |           |                        |                           |
| HSD17B3                                            | Hydroxysteroid (17-beta) dehydrogenase 3                                  | U05659    | <a href="#">3293</a>   | 2.8                       |
| HSD17B4                                            | Hydroxysteroid (17-beta) dehydrogenase 4                                  | BQ433160  | <a href="#">3295</a>   | 2.2                       |
| ACOX2                                              | Acyl-Coenzyme A oxidase 2 branched chain                                  | BC047700  | <a href="#">8309</a>   | 2.1                       |
| DHRS9                                              | Dehydrogenase/reductase member 9                                          | BU626782  | <a href="#">10170</a>  | 2.0                       |
| YWHAZ                                              | Tyrosine 3-monooxygenase/tryptophan 5-monooxygenase act prot zeta         | BQ441212  | <a href="#">7534</a>   | 2.0                       |
| NPC2                                               | Niemann-Pick disease type C2                                              | CR608935  | <a href="#">10577</a>  | 1.8                       |
| PSAP                                               | Prosaposin                                                                | BT006849  | <a href="#">5660</a>   | 1.8                       |
| <b>METABOLISM - PROTEIN</b>                        |                                                                           |           |                        |                           |
| MAOA                                               | Monoamine oxidase A                                                       | NM_000240 | <a href="#">4128</a>   | 2.4                       |
| SHMT2                                              | Serine hydroxymethyltransferase 2                                         | BM920284  | <a href="#">6472</a>   | 2.1                       |
| TMPRSS2                                            | Transmembrane protease serine 2                                           | AF318374  | <a href="#">7113</a>   | 2.1                       |
| SPC12                                              | Signal peptidase 12kDa                                                    | CN306845  | <a href="#">28972</a>  | 2.0                       |
| PSMB1                                              | Proteasome subunit beta type 1                                            | CR615498  | <a href="#">5689</a>   | 1.8                       |
| PCCB                                               | Propionyl Coenzyme A carboxylase beta polypeptide                         | CD014123  | <a href="#">5096</a>   | 1.7                       |
| TCEB1                                              | Transcription elongation factor B polypeptide 1                           | W81685    | <a href="#">6921</a>   | 1.7                       |
| SEPHS2                                             | Selenophosphate synthetase 2                                              | NM_012248 | <a href="#">22928</a>  | 1.7                       |
| HACE1                                              | HECT domain and ankyrin repeat containing E3 ubiquitin protein ligase 1   | AL834202  | <a href="#">57531</a>  | 1.6                       |
| CPE                                                | Carboxypeptidase E                                                        | AA744054  | <a href="#">1363</a>   | -1.7                      |
| HGD                                                | Homogentisate 12-dioxygenase                                              | BC020792  | <a href="#">3081</a>   | -2.0                      |
| GSTM1                                              | Glutathione S-transferase M1                                              | NM_000561 | <a href="#">2944</a>   | -2.2                      |
| DPP4                                               | Dipeptidylpeptidase 4                                                     | CA446944  | <a href="#">1803</a>   | -2.2                      |
| <b>METABOLISM - OTHER</b>                          |                                                                           |           |                        |                           |
| OAZ2                                               | Ornithine decarboxylase antizyme 2                                        | BU506882  | <a href="#">4947</a>   | 1.6                       |
| <b>PROLIFERATION / DIFFERENTIATION / APOPTOSIS</b> |                                                                           |           |                        |                           |
| CDKN2C                                             | Cyclin-dependent kinase inhibitor 2C                                      | NM_078626 | <a href="#">1031</a>   | 2.3                       |
| FTH1                                               | Ferritin heavy polypeptide 1                                              | BQ219393  | <a href="#">2495</a>   | 1.9                       |
| DAD1                                               | Defender against cell death 1                                             | BQ644712  | <a href="#">1603</a>   | 1.9                       |
| NEDD5                                              | Neural precursor cell expressed developmentally down-regulated 5          | NM_004404 | <a href="#">4735</a>   | 1.7                       |
| NME1                                               | Non-metastatic cells 1 protein expressed in                               | AL360191  | <a href="#">4830</a>   | 1.5                       |
| LTBR                                               | Lymphotoxin beta receptor                                                 | BM983044  | <a href="#">4055</a>   | -1.3                      |
| AZGP1                                              | Alpha-2-glycoprotein 1 zinc                                               | BC005306  | <a href="#">563</a>    | -4.7                      |
| <b>SIGNAL TRANSDUCTION</b>                         |                                                                           |           |                        |                           |
| CDK2AP1                                            | CDK2-associated protein 1                                                 | BU608264  | <a href="#">8099</a>   | 1.9                       |
| RAB6A                                              | RAB6A member RAS oncogene family                                          | AF052130  | <a href="#">5870</a>   | 1.7                       |
| MME                                                | Membrane metallo-endopeptidase                                            | AL833459  | <a href="#">4311</a>   | 1.7                       |
| SNX3                                               | Sorting nexin 3                                                           | BQ440796  | <a href="#">8724</a>   | 1.7                       |
| RAB18                                              | RAB18 member RAS oncogene family                                          | AL136734  | <a href="#">22931</a>  | 1.7                       |
| RHOT2                                              | Ras homolog gene family member T2                                         | CR597322  | <a href="#">89941</a>  | 1.7                       |
| RHOA                                               | Ras homolog gene family member A                                          | BC000946  | <a href="#">387</a>    | 1.7                       |
| RAB2                                               | RAB2 member RAS oncogene family                                           | AI624450  | <a href="#">5862</a>   | 1.6                       |
| PRKAR1A                                            | Protein kinase cAMP-dependent regulatory type I alpha                     | CR749311  | <a href="#">5573</a>   | 1.6                       |
| JUN                                                | V-jun sarcoma virus 17 oncogene homolog                                   | NM_002228 | <a href="#">3725</a>   | -1.6                      |
| CD59                                               | CD59 antigen p18-20                                                       | NM_000611 | <a href="#">966</a>    | -1.8                      |
| <b>STRUCTURAL / ADHESION / MOTILITY</b>            |                                                                           |           |                        |                           |
| TMSL3                                              | Thymosin-like 3                                                           | AA075339  | <a href="#">7117</a>   | 1.9                       |
| ARPC2                                              | Actin related protein 2/3 complex subunit 2 34kDa                         | BF032998  | <a href="#">10109</a>  | 1.7                       |
| CAPZA2                                             | Capping protein muscle Z-line alpha 2                                     | NM_006136 | <a href="#">830</a>    | 1.6                       |
| DNCL1                                              | Dynein cytoplasmic light polypeptide 1                                    | BQ053182  | <a href="#">8655</a>   | 1.6                       |
| MYBPC1                                             | Myosin binding protein C slow type                                        | BF516586  | <a href="#">4604</a>   | -2.6                      |
| KRT15                                              | Keratin 15                                                                | BT007261  | <a href="#">3866</a>   | -16.6                     |
| <b>TRANSCRIPTION REGULATION</b>                    |                                                                           |           |                        |                           |
| HIRIP3                                             | HIRA interacting protein 3                                                | NM_003609 | <a href="#">8479</a>   | 2.1                       |
| PC4                                                | Activated RNA polymerase II transcription cofactor 4                      | CN353311  | <a href="#">10923</a>  | 1.9                       |
| HMGB1                                              | High-mobility group box 1                                                 | BX422156  | <a href="#">3146</a>   | 1.7                       |
| NSEP1                                              | Nuclease sensitive element binding protein 1                              | CD249962  | <a href="#">4904</a>   | 1.6                       |
| TCEA1                                              | Transcription elongation factor A 1                                       | X62585    | <a href="#">6917</a>   | 1.6                       |
| JUNB                                               | Jun B proto-oncogene                                                      | CD364940  | <a href="#">3726</a>   | -1.8                      |
| ID3                                                | Inhibitor of DNA binding 3 dominant negative helix-loop-helix protein     | CR623483  | <a href="#">3399</a>   | -2.6                      |
| <b>TRANSLATION - PROTEIN SYNTHESIS</b>             |                                                                           |           |                        |                           |
| LOC388817                                          | Peptidylprolyl isomerase A-like                                           | BM972350  | <a href="#">388817</a> | 1.8                       |
| SERP1                                              | Stress-associated endoplasmic reticulum protein 1                         | AI136807  | <a href="#">27230</a>  | 1.8                       |
| EIF4A1                                             | Eukaryotic translation initiation factor 4A isoform 1                     | BQ641880  | <a href="#">1973</a>   | 1.7                       |
| CD63                                               | CD63 antigen                                                              | M58485    | <a href="#">967</a>    | 1.7                       |
| VBP1                                               | Von Hippel-Lindau binding protein 1                                       | BI544456  | <a href="#">7411</a>   | 1.6                       |
| RPL13                                              | Ribosomal protein L13                                                     | AW027288  | <a href="#">6137</a>   | -1.4                      |
| <b>TRANSPORT</b>                                   |                                                                           |           |                        |                           |
| KCTD12                                             | Potassium channel tetramerisation domain containing 12                    | NM_138444 | <a href="#">115207</a> | 2.6                       |
| AP3S1                                              | Adaptor-related protein complex 3 sigma 1 subunit                         | BU195783  | <a href="#">1176</a>   | 1.7                       |
| SEC14L1                                            | SEC14-like 1                                                              | CB851323  | <a href="#">6397</a>   | 1.7                       |
| ENSA                                               | Endosulfine alpha                                                         | BX447080  | <a href="#">2029</a>   | 1.7                       |
| ARF3                                               | ADP-ribosylation factor 3                                                 | M74491    | <a href="#">377</a>    | 1.6                       |
| SLC22A3                                            | Solute carrier family 22 member 3                                         | CR619195  | <a href="#">6581</a>   | -2.9                      |
| <b>OTHER / UNKNOWN</b>                             |                                                                           |           |                        |                           |
| FLJ12806                                           | Hypothetical protein FLJ12806                                             | AL833718  | <a href="#">64853</a>  | 2.3                       |
| FCGR3B                                             | Fc fragment of IgG low affinity IIIb receptor for (CD16)                  | CR599546  | <a href="#">2215</a>   | 2.2                       |
| FLJ35093                                           | FLJ35093 protein                                                          | AU131144  | <a href="#">374886</a> | 2.0                       |
| KIAA0103                                           | KIAA0103                                                                  | NM_014673 | <a href="#">9694</a>   | 1.9                       |
| HSPC152                                            | Hypothetical protein HSPC152                                              | BU543616  | <a href="#">51504</a>  | 1.7                       |
| C20orf45                                           | Chromosome 20 open reading frame 45                                       | BQ951436  | <a href="#">51012</a>  | 1.7                       |
| C14orf87                                           | Chromosome 14 open reading frame 87                                       | BC071690  | <a href="#">51218</a>  | 1.6                       |
