# Supplementary material
Source: PubMed Central journal article supplement (PMC1544162)

## HSD17B4 RT-PCR

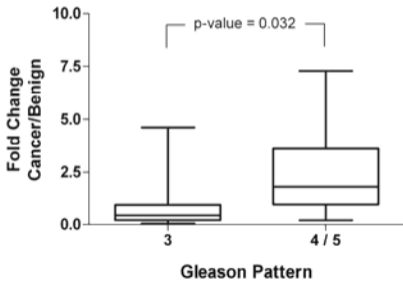

Supplement: pnas_0603678103_1.pdf [file pnas_0603678103_1.pdf]
